# Supplementary material
Source: HighWire-hosted journal article supplement (http://qualitysafety.bmj.com/highwire/filestream/147400/field_highwire_adjunct_files/0/Appendix_I.pdf)
Supplement: Appendix_I.pdf [file Appendix_I.pdf]

## Appendix I

### Reliability coefficients (Cronbach's alpha) of the 12 safety culture dimensions

| Dimensions                                                   | Items              | Alpha (Dutch version) | Alpha (French version) |
|--------------------------------------------------------------|--------------------|-----------------------|------------------------|
| Frequency of event reporting                                 | D1, D2, D3         | 0.85                  | 0.87                   |
| Overall perceptions of patient safety                        | A10, A15, A17, A18 | 0.58                  | 0.63                   |
| Supervisor/manager expectations and actions promoting safety | B1, B2, B3, B4     | 0.77                  | 0.75                   |
| Organizational learning—continuous improvement               | A6, A9, A13        | 0.59                  | 0.59                   |
| Teamwork within units                                        | A1, A3, A4, A11    | 0.66                  | 0.82                   |
| Communication openness                                       | C2, C4, C6         | 0.65                  | 0.72                   |
| Feedback and communication about error                       | C1, C3, C5         | 0.78                  | 0.76                   |
| Nonpunitive response to error                                | A8, A12, A16       | 0.68                  | 0.64                   |
| Staffing                                                     | A2, A5, A7, A14    | 0.57                  | 0.52                   |
| Management support for patient safety                        | F1, F8, F9         | 0.72                  | 0.77                   |
| Teamwork across units                                        | F2, F4, F6, F10    | 0.66                  | 0.68                   |
| Handoffs and transitions                                     | F3, F5, F7, F11    | 0.71                  | 0.72                   |
